# Supplementary material for: Tolerability of bedtime diuretics: a prospective cohort analysis
Source: PubMed Central journal article supplement — BMJ Open. 2023 Jun 6;13(6):e068188. doi: 10.1136/bmjopen-2022-068188 (PMC10255011; doi:10.1136/bmjopen-2022-068188), 2023-06-06
Supplement: bmjopen-2022-068188supp001.pdf [file bmjopen-2022-068188supp001.pdf]

## Tolerability of Bedtime Diuretics: A Prospective Cohort Analysis (Supplemental Information)

| <b>Supplemental Table 1. Comparison of baseline characteristics for participants that were excluded vs. included in the primary outcome analysis</b> |                            |                             |         |
|------------------------------------------------------------------------------------------------------------------------------------------------------|----------------------------|-----------------------------|---------|
| Characteristics                                                                                                                                      | Excluded (n=46)<br>No. (%) | Included (n=533)<br>No. (%) | p-value |
| Sex, female                                                                                                                                          | 27 (58.7)                  | 308 (57.8)                  | 0.99    |
| Province                                                                                                                                             |                            |                             |         |
| Alberta                                                                                                                                              | 39 (84.8)                  | 442 (82.9)                  | 0.84    |
| British Columbia                                                                                                                                     | 4 (8.7)                    | 48 (9.0)                    | 0.99    |
| Manitoba                                                                                                                                             | 2 (4.4)                    | 35 (6.6)                    | 0.76    |
| Saskatchewan                                                                                                                                         | 1 (2.2)                    | 8 (1.5)                     | 0.53    |
| Rural resident                                                                                                                                       | 4 (8.7)                    | 71 (13.3)                   | 0.49    |
| Age, mean (STD), y                                                                                                                                   | 64.6 (10.6)                | 65.5 (10.0)                 | 0.55    |
| ≤ 29                                                                                                                                                 | 0                          | 1 (0.2)                     | 0.99    |
| 30 - 39                                                                                                                                              | 0                          | 2 (0.4)                     | 0.99    |
| 40 - 49                                                                                                                                              | 3 (6.5)                    | 24 (4.5)                    | 0.46    |
| 50 - 59                                                                                                                                              | 9 (19.6)                   | 116 (21.8)                  | 0.85    |
| 60 - 69                                                                                                                                              | 18 (39.1)                  | 202 (37.9)                  | 0.87    |
| 70 - 79                                                                                                                                              | 11 (23.9)                  | 146 (27.4)                  | 0.73    |
| 80 - 89                                                                                                                                              | 5 (10.9)                   | 39 (7.3)                    | 0.38    |
| ≥ 90                                                                                                                                                 | 0                          | 3 (0.6)                     | 0.99    |
| Ethnicity                                                                                                                                            |                            |                             |         |
| White                                                                                                                                                | 43 (93.5)                  | 504 (94.6)                  | 0.73    |
| South east asian                                                                                                                                     | 0                          | 12 (2.3)                    | 0.61    |
| Asian                                                                                                                                                | 1 (2.2)                    | 3 (0.6)                     | 0.28    |
| First nation                                                                                                                                         | 0                          | 6 (1.1)                     | 0.99    |
| Black                                                                                                                                                | 0                          | 0                           | 0.99    |
| Other                                                                                                                                                | 1 (2.2)                    | 7 (1.3)                     | 0.49    |
| Decline to answer                                                                                                                                    | 1 (2.2)                    | 1 (0.2)                     | 0.15    |

|                                                             |            |             |      |
|-------------------------------------------------------------|------------|-------------|------|
| Education level                                             |            |             |      |
| Less than high school                                       | 4 (8.7)    | 21 (3.9)    | 0.13 |
| High school diploma                                         | 19 (41.3)  | 147 (27.6)  | 0.06 |
| Technical or trade college diploma                          | 9 (19.6)   | 146 (27.4)  | 0.30 |
| University degree                                           | 13 (28.3)  | 219 (41.1)  | 0.12 |
| Decline to answer                                           | 1 (2.2)    | 0           | 0.08 |
| Annual household income, CAD\$                              |            |             |      |
| < 25,000                                                    | 4 (8.7)    | 25 (4.7)    | 0.28 |
| 25,000 to 100,000                                           | 20 (43.5)  | 287 (53.8)  | 0.22 |
| > 100,000                                                   | 20 (43.5)  | 189 (35.5)  | 0.34 |
| Decline to answer                                           | 2 (4.4)    | 32 (6.0)    | 0.99 |
| Comorbidities <sup>a</sup>                                  |            |             |      |
| Coronary artery disease                                     | 9 (19.6)   | 100 (18.8)  | 0.85 |
| Diabetes                                                    | 6 (13)     | 92 (17.3)   | 0.54 |
| Sleep apnea                                                 | 11 (23.9)  | 99 (18.6)   | 0.43 |
| Chronic kidney disease                                      | 7 (15.2)   | 48 (9.0)    | 0.19 |
| COPD                                                        | 6 (13.0)   | 50 (9.4)    | 0.43 |
| Stroke                                                      | 1 (2.2)    | 28 (5.3)    | 0.72 |
| Heart failure                                               | 0          | 10 (1.9)    | 0.99 |
| Hip fracture                                                | 1 (2.2)    | 2 (0.4)     | 0.22 |
| Cigarette smoker (current)                                  | 2 (4.4)    | 42 (7.9)    | 0.56 |
| Nocturia, median (IQR), nocturnal urinations/wk             | 7 (0-14.0) | 6 (1-10.5)  | 0.61 |
| Does not experience nocturia                                | 12 (26.1)  | 129 (24.2)  | 0.72 |
| Nocturia occurs but "not a problem"                         | 21 (45.6)  | 255 (47.8)  | 0.88 |
| Nocturia "a minor problem"                                  | 12 (26.1)  | 139 (26.1)  | 0.99 |
| Nocturia "a major problem"                                  | 1 (2.2)    | 10 (1.9)    | 0.60 |
| Physical exercise, median (IQR), days per week <sup>b</sup> | 3 (0-5.0)  | 3 (0.5-5.0) | 0.42 |
| 0                                                           | 15 (32.6)  | 133 (25.0)  | 0.29 |
| 1                                                           | 6 (13.0)   | 43 (8.1)    | 0.26 |
| 2                                                           | 1 (2.2)    | 68 (12.8)   | 0.03 |
| 3                                                           | 6 (13.0)   | 75 (14.1)   | 0.99 |
| 4                                                           | 6 (13.0)   | 54 (10.1)   | 0.46 |
| 5                                                           | 2 (4.4)    | 49 (9.2)    | 0.41 |

|                                                          |                  |                  |      |
|----------------------------------------------------------|------------------|------------------|------|
| 6                                                        | 1 (2.2)          | 15 (2.8)         | 0.99 |
| 7                                                        | 9 (19.6)         | 96 (18.0)        | 0.84 |
| BMI, median (IQR), Kg/M <sup>2</sup>                     | 27.7 (26.1-33.4) | 28.3 (25.5-32.3) | 0.80 |
| Underweight (< 18.5)                                     | 0                | 3 (0.6)          | 0.99 |
| Normal weight (18.5 - 24.9)                              | 9 (19.6)         | 105 (19.7)       | 0.99 |
| Overweight (25 - 29.9)                                   | 21 (45.7)        | 220 (41.3)       | 0.64 |
| Obese (≥ 30)                                             | 16 (34.8)        | 205 (38.5)       | 0.75 |
| EQ-5D-5L overall health score, median (IQR) <sup>c</sup> | 80 (75-90)       | 80 (75-90)       | 0.88 |
| Physically frail <sup>d</sup>                            | 7 (15.2)         | 73 (13.7)        | 0.82 |
| Cognition <sup>e</sup>                                   |                  |                  |      |
| Normal                                                   | 41 (89.1)        | 496 (93.1)       | 0.37 |
| Questionable impairment                                  | 3 (6.5)          | 36 (6.8)         | 0.99 |
| Impairment consistent with dementia                      | 2 (4.4)          | 1 (0.2)          | 0.02 |

<sup>a</sup> Derived from Alberta provincial health claims data and self-report.

<sup>b</sup> "How many days in the past week have you exercised for 30 minutes or more, vigorously enough to raise your breathing rate?"

<sup>c</sup> Self-rating of overall health on a scale of 0 (worst) to 100 (best).

<sup>d</sup> As per Tilburg Frailty Indicator's physical sub-scale (sub-scale score ≥3 defines physically frail).

<sup>e</sup> As per Short Blessed screening test score. Considered to be normal (0-4), questionable impairment (5-9), or impairment consistent with dementia (>9).

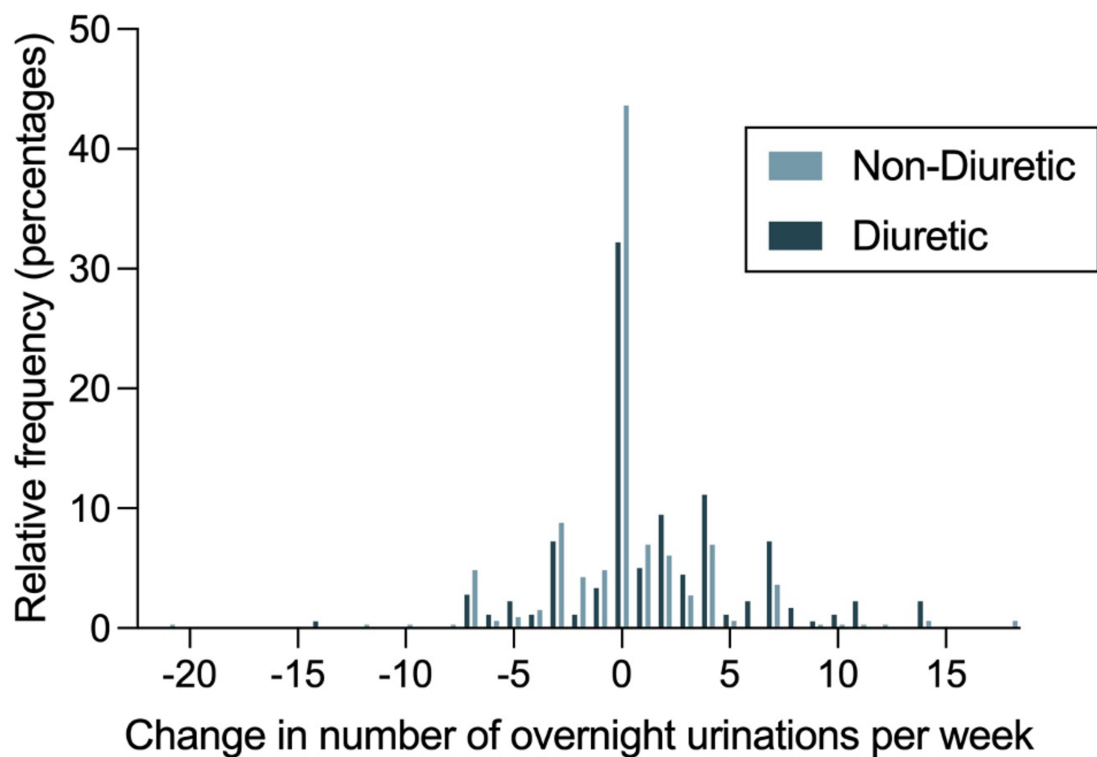

**Supplemental Figure 1. 6-week change in overnight urinations per week.**

Figure is the change in the number of overnight urinations per week experienced by hypertensive primary care patients 6-weeks after being randomly allocated to switch their only blood pressure lowering pill from morning to bedtime. Grouped by those whose pill contained a diuretic (90.7% of which were thiazides), and those who used a different class of blood pressure lowering medication.
